# Supplementary material
Source: publisher site journal article supplement (https://www.degruyterbrill.com/publication/isbn/9783110978773/downloadAsset/9783110978773_Inhaltsverzeichnis.pdf)
Supplement: Supplementary file 1 [file 9783110978773_Inhaltsverzeichnis.pdf]

## Inhaltsübersicht

|                                               |      |
|-----------------------------------------------|------|
| Verzeichnis späterer Normänderungen . . . . . | IX   |
| Abkürzungsverzeichnis . . . . .               | XVII |

## AKTIENGESETZ

### ERSTES BUCH

### AKTIENGESELLSCHAFT

|                     |                                                                      |            |
|---------------------|----------------------------------------------------------------------|------------|
| <i>Dritter Teil</i> | Rechtsverhältnisse der Gesellschaft und der Gesellschafter . . . . . | §§ 53a–75* |
|---------------------|----------------------------------------------------------------------|------------|

Sachregister

---

\* Die durchgängige Kommentierung der §§ 54 bis 66 stammt aus dem Jahr 2000; der später durch das Gesetz zur weiteren Reform des Aktien- und Bilanzrechts, zu Transparenz und Publizität (Transparenz- und Publizitätsgesetz) vom 19. Juli 2002 (BGBl. I 2681) eingefügte § 58 Absatz 5 wurde 2008 ergänzend kommentiert. Diese Erläuterungen befinden sich in diesem Band hinter der Kommentierung des § 58 und vor der Kommentierung des § 59.
